**PRIMER**

# The Mediator complex: a master coordinator of transcription and cell lineage development

Jing-wen Yin and Gang Wang\*

**ABSTRACT**

Mediator is a multiprotein complex that is required for gene transcription by RNA polymerase II. Multiple subunits of the complex show specificity in relaying information from signals and transcription factors to the RNA polymerase II machinery, thus enabling control of the expression of specific genes. Recent studies have also provided novel mechanistic insights into the roles of Mediator in epigenetic regulation, transcriptional elongation, termination, mRNA processing, noncoding RNA activation and super enhancer formation. Based on these specific roles in gene regulation, Mediator has emerged as a master coordinator of development and cell lineage determination. Here, we describe the most recent advances in understanding the mechanisms of Mediator function, with an emphasis on its role during development and disease.

**KEY WORDS:** Mediator complex, Transcription, Cell fate, Lineage development, Disease

**Introduction**

Mediator is a large, multisubunit complex that was discovered following efforts to understand how RNA polymerase II (Pol II)-mediated transcription is regulated by transcription factors in yeast (Nonet and Young, 1989; Kelleher et al., 1990; Thompson et al., 1993; Kim et al., 1994). The complex, which consists of ~30 polypeptides (Fig. 1), shows conservation from yeast to humans and plays an indispensable role in regulating transcription. Multiple laboratories then used a variety of procedures to isolate mammalian Mediator complexes, which were named TRAP/SMCC, NAT, ARC, DRIP, Srb/MED, PC2, CRSP and mouse Mediator (Jiang et al., 1998; Sun et al., 1998; Boyer et al., 1999; Ito et al., 1999; Kingston, 1999; Näär et al., 1999; Rachez et al., 1999; Ryu et al., 1999; Malik et al., 2000). In 2004, a unified nomenclature for Mediator was established, consisting of MED1 to MED31, together with the cyclin-dependent kinase (CDK) 8-cyclin C pair and several paralogs such as MED1-like (MED1L), MED12L, MED13L and CDK19 (Bourbon et al., 2004). The Mediator complex can be divided into four distinct modules termed the head, middle, tail and CDK8 kinase module, which contains CDK8 (or its paralog CDK19), cyclin C, MED12 (or MED12L) and MED13 (or MED13L) subunits (Malik and Roeder, 2010; Taatjes, 2010). Importantly, the subunit composition of Mediator can vary and is not restricted to a single isoform. For example, immunodepletion of the Mediator complex from HeLa nuclear extracts with an anti-CDK8 antibody revealed that Mediator exists as at least two main isoforms, distinguished by the presence or absence of the CDK8 submodule (Wang et al.,

2001). In addition, MED1 and MED26 are not present in all isolated isoforms (Malik and Roeder, 2010).

After the initial discovery of Mediator, research mainly focused on how the Mediator complex conveys signals from transcription factors to the Pol II machinery and general transcription factors (GTFs). These studies led to the formulation of the ‘bridge’ model, in which Mediator connects the transcription factor and Pol II machineries and promotes formation of the pre-initiation complex (Biddick and Young, 2005; Björklund and Gustafsson, 2005; Malik and Roeder, 2005). However, it soon emerged that multiple pathways responsible for cell growth, differentiation or tissue development were able to converge on one or more of the almost 30 subunits of Mediator through transcriptional regulators, suggesting that Mediator acts as a centralized ‘hub’ or ‘integrator’ for transcriptional regulation (Malik and Roeder, 2010; Carlsten et al., 2013). Recently, an increasing number of studies have revealed new functions for Mediator, highlighting its involvement in almost all stages of Pol II transcription, including epigenetic regulation, transcriptional elongation, termination, mRNA processing, noncoding RNA activation and super enhancer formation (Fig. 2). Recent evidence has also highlighted a role for the Mediator complex in developmental abnormalities, cancer and metabolic disorders. It thus seems that Mediator acts as a master coordinator that regulates multiple aspects of transcription to ensure the accurate intensity, pattern and timing of global gene expression both during development and in adults. Here, we describe the most recent studies of the Mediator complex, with an emphasis on its functions in development and disease.

**Molecular mechanisms of Mediator function in transcriptional control**

In addition to interacting with many transcription factors, an increasing number of studies have indicated that the Mediator complex can serve as the interface for multiple transcriptional co-factors, noncoding RNAs and other factors (Table 1). Below, we review selected interactions between well-defined co-factors/complexes and Mediator and discuss their potential effects on gene expression and their developmental consequences.

**Interactions with master regulators of cell fate**

Some DNA-binding transcription factors, also called ‘master regulators’, have the ability to determine lineage-specific transcriptional programs. For example, MyoD, PPAR $\gamma$  and Runx2 control the gene programs leading to differentiation into skeletal muscle, adipocytes and osteocytes, respectively (Davis et al., 1987; Tontonoz et al., 1995; Komori, 2002). More recently, four ‘Yamanaka’ factors [Oct4 (also known as Pou5f1), Sox2, c-Myc and Klf4] were shown to directly reprogram many types of somatic cells into pluripotent stem cells (Takahashi and Yamanaka, 2006; Wernig et al., 2008). In addition, many lineage-specific or non-specific transcription factors have been used to convert fibroblasts to particular cell fates,

State Key Laboratory of Cell Biology, Institute of Biochemistry and Cell Biology, Shanghai Institutes for Biological Sciences, Chinese Academy of Sciences, Shanghai 200031, China.

\*Author for correspondence (gwang@sibcb.ac.cn)

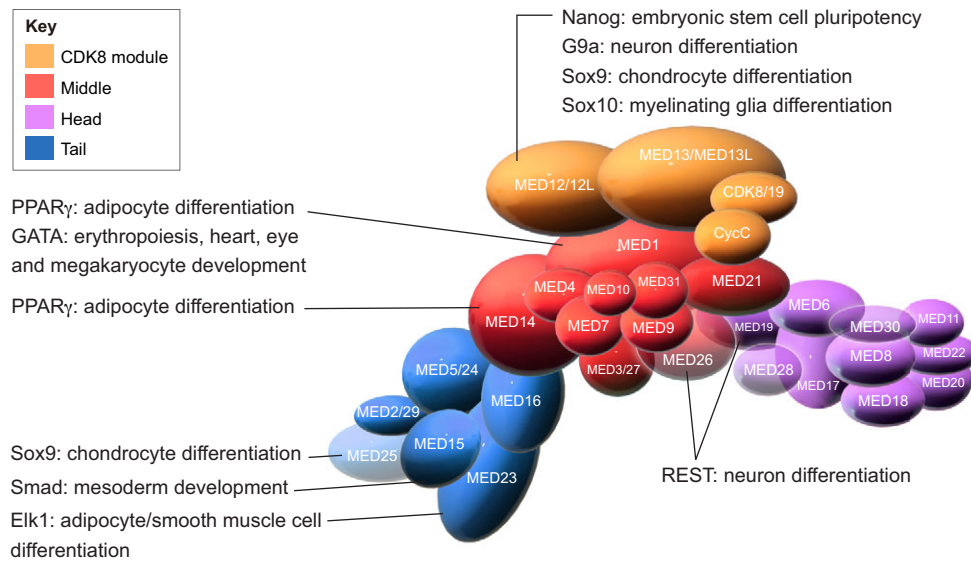

**Fig. 1. Composition of the mammalian Mediator complex.** The predicted composition of the complex and the relative sizes of individual subunits are based on the published literature. The positions of several subunits (e.g. MED25, MED26, MED28 and MED30) are postulated, as denoted by their transparency (see Larivière et al., 2012). Several representative transcription factor-Mediator subunit interactions and their involvement in developmental processes are indicated.

such as cardiomyocytes, blood cells, neurons and hepatocytes (Ieda et al., 2010; Szabo et al., 2010; Vierbuchen et al., 2010; Huang et al., 2011; Sekiya and Suzuki, 2011). A common theme seems to be that, once the key transcription regulator(s) had been identified and were overexpressed, the cell fate could be reprogrammed (i.e. changed). Since the discovery of the Mediator complex, many such master regulators have been found to target one or more Mediator subunits for their transcriptional activities, which led to the notion that the Mediator complex acts as a master coordinator of cell fate determination. For example, MED1 is targeted by the adipocyte master regulator PPAR $\gamma$  (Fig. 1) (Ge et al., 2002). Later research revealed that the association between MED1 and the erythroid regulator GATA1 determined blood cell lineage development (Stumpf et al., 2006). Importantly, the actions of PPAR $\gamma$  and of GATA1 are likely to be separated by developmental timing and space and it is thus unlikely that these two factors could simultaneously act upon a cell lineage and result in confused cell identity.

Mediator subunits can also play antagonistic roles in lineage specification. We recently demonstrated that the presence or absence of MED23 in mesenchymal stem cells can tune up or down two gene programs resulting in two distinct cell fates, namely adipocyte or smooth muscle cells (Fig. 1) (Wang et al., 2009; Yin et al., 2012). Additional examples of lineage regulation by Mediator include the interaction between the chondrogenesis master regulator Sox9 and MED12 and MED25 (Zhou et al., 2002; Nakamura et al., 2011), and the interaction between the pluripotency factor Nanog and MED12 (Fig. 1) (Tutter et al., 2009). Thus, in its role as an interface between transcription factors and the Pol II transcription machinery, the Mediator complex is able to orchestrate multiple master regulators for specifying distinct cell lineages, supporting the idea that Mediator may qualify as a master coordinator for cell lineage specification. It should be noted, however, that as a master coordinator, a Mediator subunit might be required for a particular master regulator to direct the cell lineage, but overexpression of the subunit should not be sufficient to change the cell fate.

#### Mediator and the cohesin complex for cell type-specific gene activity

DNA loop formation, which promotes communication between enhancer-bound transcription factors and the general transcription machinery at the core promoter region, plays an important role during gene activation. This looping can be mediated in part by the

cohesin complex (Dorsett, 2011; Remeseiro et al., 2013). Chromatin immunoprecipitation followed by sequencing (ChIP-seq) and biochemical analyses revealed that Mediator collaborates with the cohesin complex to link enhancers to core promoters to activate transcription of different sets of genes in mouse embryonic stem cells (ESCs) and mouse embryonic fibroblasts (MEFs) (Kagey et al., 2010). Short hairpin RNA (shRNA)-mediated reduction of the components of either the Mediator complex or the cohesin complex yielded similar phenotypes: loss of the ESC state, as indicated by reduced Oct4 expression and disrupted ESC colonies (Kagey et al., 2010; Apostolou et al., 2013; Phillips-Cremens et al., 2013). The direct interaction between Mediator and the cohesin complex, together with the cell type-specific co-occupation of the Mediator-cohesin complex at distinct genomic regions, suggests that the Mediator-cohesin complex promotes cell type-specific gene activation through enhancer-promoter DNA looping.

#### Mediator mediates 'super enhancer' formation for cell identity

How does Mediator function with the master regulators of different lineage programs? Recent work by the Young group suggests a mechanistic relationship between the master regulators and the Mediator complex (Whyte et al., 2013). This study demonstrated that the Mediator complex can promote the formation of super enhancers, which are clusters of enhancers occupied by both Mediator and master regulator(s). Such super enhancers are usually established with different master transcription factors and act to control the key cell identity genes in different cell types such as ESCs, pro-B cells, myotubes, T helper cells and macrophages (Whyte et al., 2013). Accordingly, reduced levels of Mediator or master transcription factors result in preferentially reduced expression of lineage-specific genes. This role of the Mediator complex in establishing super enhancers provides novel mechanistic insights into how it might function in developmental gene regulation.

#### Mediator and epigenetic regulators

Cell-specific transcription patterns can be altered by modulating the activity or expression of a few master regulators of cell fate. However, epigenetics also plays an important role in cell type specification, and it is now clear that the differentiation process is accompanied by major changes at the chromatin level (Dambacher et al., 2013). Recent studies have begun to examine the relationship

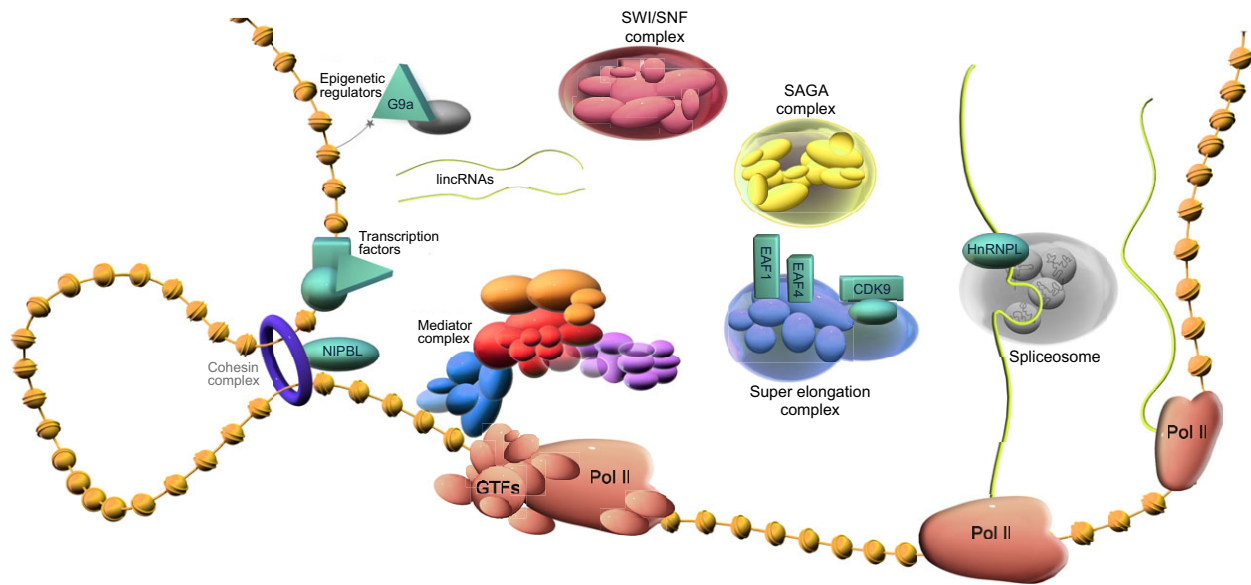

**Fig. 2. Model summarizing interactions between the Mediator complex and other well-defined complexes/factors during transcription.** Subunits of the Mediator complex interact with various transcription factors, long intergenic noncoding RNAs (lincRNAs), epigenetic regulators and other factors. As such, the Mediator complex plays a role in epigenetic modification, super enhancer formation, DNA loop formation, transcription initiation, elongation, termination, RNA splicing and noncoding RNA interaction. Other large complexes, such as the SAGA complex, the SWI/SNF complex, the spliceosome and the super elongation complex, also interact with Mediator. GTFs, general transcription factors; HnRNPL, heterogeneous nuclear ribonucleoprotein L.

between the Mediator complex and epigenetic regulators. For example, a neuronal-specific repressor, REST, binds to Mediator subunits MED19 and MED26, which then further recruit G9a (also known as Ehmt2), a histone H3K9 methyltransferase, through a MED12-G9a interaction (Fig. 1) (Ding et al., 2008). This complex can repress neuronal genes in non-neuronal cells. Furthermore, *MED12* mutations found in patients with X-linked intellectual disability attenuated the ability of Mediator to recruit G9a and induced abnormal neuronal gene expression (Ding et al., 2008). In another report, the two kinase subunits of Mediator, CDK8 and CDK19, were shown to interact with the histone arginine methyltransferase PRMT5 and WD-repeat protein 77 (WDR77; also known as MEP50), respectively, both of which are important for further recruitment of the DNA methyltransferase DNMT3A and subsequent repression of C/EBP $\beta$ -regulated genes (Tsutsui et al., 2013). Thus, individual Mediator components appear to exhibit specificity for distinct epigenetic events, such as the recruitment of specific histone or DNA modifiers which, in turn, influence specific epigenetic modifications.

#### Mediator and transcriptional elongation and termination

Promoter-proximal pausing of Pol II and the release of paused Pol II into productive elongation has emerged as an important mechanism of transcriptional control (Adelman and Lis, 2012). Accumulating evidence suggests that Mediator is involved in releasing the paused Pol II and prompting productive elongation. For example, it was recently demonstrated that Pol II elongation correlates with Mediator-dependent recruitment of super elongation complexes (SECs) that contain members of the eleven-nineteen lysine-rich in leukemia (ELL) family and their binding partners ELL-associated factors (EAFs), positive transcription elongation factor b (P-TEFb) and other proteins (Takahashi et al., 2011). In this study, it was observed that the N-terminus of MED26 contains docking sites for SEC and another ELL/EAF-containing complex, as well as the general transcription initiation factor TFIID. MED26

might therefore function as a molecular switch that first binds to TFIID in the pre-initiation complex and then exchanges to the SECs for Pol II elongation (Takahashi et al., 2011).

Recent studies suggest that the CDK8 module is also involved in transcriptional elongation. Originally, the CDK8 module was described as a co-repressor for transcription because the phosphorylation of Pol II C-terminal domain and TFIID by CDK8 could block the assembly and function of the transcription initiation complex (Hengartner et al., 1998; Sun et al., 1998; Akoulitchev et al., 2000). However, it was previously found that CDK8 is also present at a serum-activated gene promoter (Wang et al., 2005), suggesting that CDK8 has a positive function during transcription. Moreover, the Espinosa group revealed a role for CDK8 in transcriptional elongation (Donner et al., 2010). CDK8 depletion did not affect recruitment of Pol II to gene promoters or overall Pol II intragenic occupancy but instead caused impaired recruitment of CDK7 and CDK9, which are needed for recruitment of P-TEFb and BRD4 for Pol II elongation. Most recently, it was demonstrated that hypoxia-inducible factor 1A (HIF1A) recruits CDK8-Mediator and a SEC containing the SEC scaffold protein AFF4 and CDK9 to alleviate Pol II pausing (Galbraith et al., 2013). This study showed that CDK8 is dispensable for HIF1A chromatin binding but is essential for the binding of SEC and Pol II elongation in response to hypoxia.

The MED23 Mediator subunit also regulates transcription and was previously shown to control the MAPK-Elk1-activated *Egr1* gene after pre-initiation complex formation, i.e. at a post-recruitment step (Wang et al., 2005). Under serum stimulation, MED23 depletion disrupts the Elk1-Mediator interaction, preventing the release of pre-bound Pol II into elongation (Wang et al., 2005). We recently demonstrated that under unstimulated conditions, *Egr1* expression is largely reduced in MED23-depleted cells, while the occupancies of Pol II, GTFs, the Mediator complex, or the activator Elk1 at the *Egr1* promoter remain unchanged (Wang et al., 2013). However, MED23 depletion

**Table 1. Interactions between Mediator subunits and well-defined factors and their role in physiological/developmental processes**

| Mediator subunit                                    | Interacting factor/complex                                                                                                                                                   | Developmental processes affected                                             | References                                                                                                                                                                                                                                                                                                                                                                                                                                                                                                                         |
|-----------------------------------------------------|------------------------------------------------------------------------------------------------------------------------------------------------------------------------------|------------------------------------------------------------------------------|------------------------------------------------------------------------------------------------------------------------------------------------------------------------------------------------------------------------------------------------------------------------------------------------------------------------------------------------------------------------------------------------------------------------------------------------------------------------------------------------------------------------------------|
| <b>Head (MED6/8/11/17/18/19/20/22)</b>              |                                                                                                                                                                              |                                                                              |                                                                                                                                                                                                                                                                                                                                                                                                                                                                                                                                    |
| MED17                                               | VP16, P53, HSF, DIF, RXR<br>STAT2, P65                                                                                                                                       |                                                                              | (Ito et al., 1999; Park et al., 2001; Park et al., 2003)<br>(Lau et al., 2003; van Essen et al., 2009)                                                                                                                                                                                                                                                                                                                                                                                                                             |
| MED19                                               | REST                                                                                                                                                                         | Neuron differentiation                                                       | (Ding et al., 2009)                                                                                                                                                                                                                                                                                                                                                                                                                                                                                                                |
| <b>Middle (MED1/1L/4/7/9/10/14/21/32)</b>           |                                                                                                                                                                              |                                                                              |                                                                                                                                                                                                                                                                                                                                                                                                                                                                                                                                    |
| MED1                                                | lincRNAs (ncRNA-a1/3/7)<br>Rα/β, PPARα, RARα, RXRα, VDR<br>RORα, GR, FXR, AHR, HNF4<br><br>ERα/β, PGC-1α, BRCA1, NR4A<br><br>GABPα, Pit-1, C/EBPβ, P53<br><br>PPARγ<br>GATA1 | Adipogenesis<br>Erythropoiesis, heart, eye and<br>megakaryocyte development  | (Lai et al., 2013)<br>(Zhu et al., 1997; Yuan et al., 1998; Rachez et al., 1999)<br>(Atkins et al., 1999; Hittelman et al., 1999; Malik et al., 2002;<br>Pineda Torra et al., 2004; Wang et al., 2004b)<br>(Zhu et al., 1999; Warnmark et al., 2001; Kang et al., 2002;<br>Wallberg et al., 2003; Wada et al., 2004; Wansa and<br>Muscat, 2005)<br>(Drane et al., 1997; Gordon et al., 2006; Udayakumar et al.,<br>2006; Li et al., 2008; Meyer et al., 2010)<br>(Ge et al., 2002)<br>(Crawford et al., 2002; Stumpf et al., 2006) |
| MED14                                               | GR, HNF4, SATAT2, SREBP-1α, ERα<br><br>PPARγ                                                                                                                                 | Adipogenesis                                                                 | (Hittelman et al., 1999; Malik et al., 2002; Lau et al., 2003;<br>Toth et al., 2004; Lee et al., 2005)<br>(Grontved et al., 2010)                                                                                                                                                                                                                                                                                                                                                                                                  |
| MED21                                               | TRα/β                                                                                                                                                                        |                                                                              | (Nevado et al., 2004)                                                                                                                                                                                                                                                                                                                                                                                                                                                                                                              |
| MED31                                               | Elmo1                                                                                                                                                                        |                                                                              | (Mauldin et al., 2013)                                                                                                                                                                                                                                                                                                                                                                                                                                                                                                             |
| <b>Tail [MED2(29)/3(27)/5(24)/15/16/23]</b>         |                                                                                                                                                                              |                                                                              |                                                                                                                                                                                                                                                                                                                                                                                                                                                                                                                                    |
| MED2(29)                                            | DSF                                                                                                                                                                          |                                                                              | (Garrett-Engle et al., 2002)                                                                                                                                                                                                                                                                                                                                                                                                                                                                                                       |
| MED15                                               | SREBP-1α, NHR-49, OAF1, Prd1, Prd3<br><br>Smad2/3/4                                                                                                                          | Mesendoderm development                                                      | (Taubert et al., 2006; Yang et al., 2006; Thakur et al., 2008;<br>Thakur et al., 2009)<br>(Kato et al., 2002)                                                                                                                                                                                                                                                                                                                                                                                                                      |
| MED16                                               | DIF                                                                                                                                                                          |                                                                              | (Kim et al., 2004)                                                                                                                                                                                                                                                                                                                                                                                                                                                                                                                 |
| MED23                                               | Splicing factor (HnRNPL)<br>Elongation factor (CDK9)<br>E1A-CR3, DIF, HSF, ESX, C/EBPβ<br><br>Elk1                                                                           | Adipogenesis/SMC differentiation                                             | (Huang et al., 2012)<br>(Wang et al., 2013)<br>(Boyer et al., 1999; Asada et al., 2002; Kim et al., 2004;<br>Mo et al., 2004)<br>(Wang et al., 2009; Yin et al., 2012)                                                                                                                                                                                                                                                                                                                                                             |
| <b>Kinase (CDK8/19; MED12/12L/13/13L; cyclin C)</b> |                                                                                                                                                                              |                                                                              |                                                                                                                                                                                                                                                                                                                                                                                                                                                                                                                                    |
| MED12                                               | lincRNAs (ncRNA-a1/3/7)<br>RTA, Gli3, β-catenin, AICD, Pygopus<br><br>SOX9<br>SOX10<br>Nanog<br>Epigenetic regulator (G9a)                                                   | Chondrogenesis<br>Myelinating glia<br>Pluripotency<br>Neuron differentiation | (Lai et al., 2013)<br>(Gwack et al., 2003; Kim et al., 2006; Zhou et al., 2006;<br>Carrera et al., 2008; Xu et al., 2011)<br>(Zhou et al., 2002)<br>(Vogl et al., 2013)<br>(Tutter et al., 2009)<br>(Ding et al., 2008)                                                                                                                                                                                                                                                                                                            |
| MED13                                               | Pygopus                                                                                                                                                                      |                                                                              | (Carrera et al., 2008)                                                                                                                                                                                                                                                                                                                                                                                                                                                                                                             |
| CDK8                                                | c-Myc, PRMT5, WDR77/MEP50                                                                                                                                                    |                                                                              | (Eberhardy and Farnham, 2002; Tsutsui et al., 2013)                                                                                                                                                                                                                                                                                                                                                                                                                                                                                |
| CDK19                                               | PRMT5, WDR77/MEP50                                                                                                                                                           |                                                                              | (Tsutsui et al., 2013)                                                                                                                                                                                                                                                                                                                                                                                                                                                                                                             |
| <b>Unassigned (MED25/26/28/30)</b>                  |                                                                                                                                                                              |                                                                              |                                                                                                                                                                                                                                                                                                                                                                                                                                                                                                                                    |
| MED25                                               | VP16, DIF, HSF, RARα, HNF4<br><br>PEA3, ERM, ER81<br>SOX9                                                                                                                    | Chondrogenesis                                                               | (Mittler et al., 2003; Kim et al., 2004; Yang et al., 2004;<br>Lee et al., 2007; Rana et al., 2011)<br>(Verger et al., 2013)<br>(Nakamura et al., 2011)                                                                                                                                                                                                                                                                                                                                                                            |
| MED26                                               | Super elongation complex (EAF1/EAF4)                                                                                                                                         |                                                                              | (Takahashi et al., 2011)                                                                                                                                                                                                                                                                                                                                                                                                                                                                                                           |
| MED28                                               | REST<br>Merlin, Grb2                                                                                                                                                         | Neuron differentiation                                                       | (Ding et al., 2009)<br>(Wiederhold et al., 2004)                                                                                                                                                                                                                                                                                                                                                                                                                                                                                   |

results in a significant decrease in P-TEFb and elongating Pol II (marked by serine-2 phosphorylation) at the coding region. Further experiments suggested that MED23 controls a basal level of transcription by recruiting elongation factor P-TEFb via a direct interaction with its CDK9 subunit (Wang et al., 2013). Taken together, these findings demonstrate that Mediator regulates transcriptional elongation, possibly by multiple subunits, through multiple mechanisms and in a gene-specific manner.

Recently, the relationship between Mediator and transcriptional termination has also been revealed. MED18 was proven to be

important for termination in yeast (Mukundan and Ansari, 2011). In the absence of MED18, the recruitment of termination factors and Pol II to the 3' end of genes was compromised, and a readthrough phenotype was found *in vitro*. Therefore, Mediator regulates not only transcriptional elongation but also termination.

#### Mediator and RNA processing

In higher species, alternative splicing affects the majority of protein-coding genes and creates a functional diversity of gene products to meet the needs of distinct cell types. Pre-mRNA splicing is largely

**Table 2. Phenotype or developmental processes affected in Mediator subunit-deficient mice or cells**

| Mediator subunit | Disease/phenotype                                                                                  | Genetic state                | References                           |
|------------------|----------------------------------------------------------------------------------------------------|------------------------------|--------------------------------------|
| MED1             | Embryonic lethal at ~E11.5                                                                         | KO                           | (Ito et al., 2000; Zhu et al., 2000) |
|                  | Erythroid development                                                                              | KO                           | (Stumpf et al., 2006)                |
|                  | Adipogenesis                                                                                       | KO                           | (Ge et al., 2002)                    |
|                  | Mammary gland development and luminal cell differentiation                                         | LxxLL motif mutant knock-in  | (Jiang et al., 2010)                 |
|                  | Embryonic lethal at ~E13.5, placental, hepatic and cardiovascular development                      | Conditional KO               | (Landles et al., 2003)               |
| MED12            | Embryonic lethal at ~E7.5                                                                          | KO                           | (Rocha et al., 2010)                 |
|                  | Embryonic lethal at ~E9.5, neural tube closure, axis elongation, somitogenesis and heart formation | Hypomorphic mutants          | (Rocha et al., 2010)                 |
|                  | Embryonic stem cell function                                                                       | KD                           | (Tutter et al., 2009)                |
| MED14            | Neuron differentiation                                                                             | KD                           | (Ding et al., 2008)                  |
|                  | Adipogenesis                                                                                       | KD                           | (Grontved et al., 2010)              |
| MED19            | Neuron differentiation                                                                             | KD                           | (Ding et al., 2009)                  |
| MED21            | Embryonic lethal at blastocyst stage                                                               | KO                           | (Tudor et al., 1999)                 |
|                  | Keratinocyte differentiation                                                                       | KD                           | (Oda et al., 2010)                   |
| MED23            | Embryonic lethal at E9-10.5                                                                        | KO                           | (Balamotis et al., 2009)             |
|                  | Adipogenesis                                                                                       | KO/KD                        | (Wang et al., 2009)                  |
|                  | Smooth muscle differentiation                                                                      | KO/KD                        | (Yin et al., 2012)                   |
| MED24            | Embryonic lethal at E8.5-10.5                                                                      | KO                           | (Ito et al., 2002)                   |
| MED25            | Chondrogenesis                                                                                     | KD                           | (Nakamura et al., 2011)              |
| MED26            | Neuron differentiation                                                                             | KD                           | (Ding et al., 2009)                  |
| MED28            | Smooth muscle differentiation                                                                      | KD                           | (Beyer et al., 2007)                 |
| MED31            | Embryonic lethal at ~E16.5-18.5, chondrogenesis                                                    | Mutation causing degradation | (Risley et al., 2010)                |
| CDK8             | Embryonic lethal at ~E2.5-3.0                                                                      | Gene trap insertion          | (Westerling et al., 2007)            |

KO, knockout; KD, knockdown.

coupled with transcription, which permits immediate recognition of emerging splicing signals by the splicing machinery. However, despite extensive research this coupling mechanism is not fully understood. Using tandem affinity purification combined with mass spectrometry, we recently identified several pre-mRNA processing factors that specifically bind to MED23 (Huang et al., 2012). Among these was heterogeneous nuclear ribonucleoprotein L (HnRNP L), the interaction of which with MED23 was verified *in vitro* and *in vivo*. Functionally, MED23 and HnRNP L co-regulate a significant subset of alternative splicing and alternative cleavage and polyadenylation events (Huang et al., 2012). These findings demonstrate an important function of Mediator in the regulation of mRNA processing and reveal cross-talk between the Mediator complex and the splicing machinery, thus providing mechanistic insight into the coupling of transcription and splicing.

#### Interactions between Mediator and long intergenic noncoding RNAs

Recent advances have revealed a large number of transcripts, termed long intergenic noncoding RNAs (lincRNAs), that display no protein-coding potential but play widespread roles in multiple biological processes (Ørom et al., 2010; Ulitsky and Bartel, 2013). A recent study demonstrated that a particular class of lincRNAs, termed ncRNA-activating (ncRNA-a), which activate neighboring genes through a cis-mediated mechanism, interact with Mediator by tethering it to chromatin for gene activation (Lai et al., 2013). Furthermore, depletion of the MED12 subunit specifically and potently diminished ncRNA-a-induced activation of transcription, and disease-related MED12 mutations diminished the ability of Mediator to associate with ncRNA-a. These results demonstrated that the Mediator complex is able to mediate transcriptional activation through noncoding RNAs, providing additional insight into Mediator function during transcription.

#### Roles of the Mediator complex in development

Given the role of different Mediator subunits in cell fate-related gene expression programs, the involvement of Mediator in many

developmental processes and human diseases is being increasingly recognized. In particular, studies of knockout mice harboring mutations in individual Mediator subunits (Table 2), together with studies in other model organisms (Table 3), have provided key insights into the developmental roles of various Mediator subunits. Below, we review these findings and discuss the key developmental processes that are influenced by individual Mediator subunits.

#### Insights from Mediator subunit knockout mice

Gene knockout (KO) technology is a powerful method for evaluating the importance of particular genes during development. Following the discovery of the Mediator complex, KO mice for several individual Mediator subunits have been generated (Table 2). Strikingly, all of these KO mice are embryonic lethal, either early or late with different defects, suggesting a general requirement for Mediator in many aspects of embryonic development.

*Med1* null mice, for example, die at embryonic day (E) 11.5 due to placental insufficiency (Ito et al., 2000; Zhu et al., 2000). These mice show impaired heart formation, abnormal neuronal development, hepatic necrosis and hematopoiesis defects. *Med1* hypomorphic mutants with reduced MED1 levels survive until E13.5 and show developmental abnormalities similar to those seen in null mice at an early stage (Landles et al., 2003). This study demonstrated that MED1 is necessary for early extra-embryonic placental development, which is probably the reason for the embryonic lethality of null mice at E11.5. This embryonic lethality could be partially rescued by tetraploid aggregation, and the embryos remained alive until E13.5 but eventually died for similar reasons as the *Med1* hypomorphic mutants, which demonstrates that MED1 is also required for later multi-organ development.

*Med12* hypomorphic mutants, by contrast, fail to develop beyond E10 and exhibit severe defects in neural tube closure, axis elongation, somitogenesis and heart formation (Rocha et al., 2010). Embryos that are incapable of expressing MED12 die at ~E7.5 and fail to establish the anterior visceral endoderm or activate brachyury

**Table 3. Phenotype or developmental processes affected following Mediator subunit perturbation in animal models**

| Mediator subunit  | Disease/phenotype                                                   | Genetic state | References                                                                    |
|-------------------|---------------------------------------------------------------------|---------------|-------------------------------------------------------------------------------|
| <b>Zebrafish</b>  |                                                                     |               |                                                                               |
| MED12             | Brain, cartilage, ear, kidney, endoderm development; chondrogenesis | Mutation      | (Rau et al., 2006; Hong et al., 2005; Wang et al., 2006; Shin et al., 2008)   |
| MED23             | Smooth muscle differentiation                                       | MO            | (Yin et al., 2012)                                                            |
| MED25             | Chondrogenesis                                                      | MO            | (Nakamura et al., 2011)                                                       |
| <b>Drosophila</b> |                                                                     |               |                                                                               |
| MED6              | Died in the third larval instar                                     | Mutation      | (Gim et al., 2001)                                                            |
| MED12/13          | Retinal, wing and crystal cell development                          | Mutation      | (Treisman, 2001; Lim et al., 2007; Janody et al., 2003; Carrera et al., 2008) |
| MED15             | Wing development                                                    | Mutation      | (Terriente-Felix et al., 2010)                                                |
| MED31             | Anteroposterior axis formation                                      | Mutation      | (Bosveld et al., 2008)                                                        |
| CDK8              | Eye development                                                     | Mutation      | (Loncle et al., 2007)                                                         |
| <b>C. elegans</b> |                                                                     |               |                                                                               |
| MED12/13          | Embryonic lethal, vulval development and T-cell division            | Mutation      | (Moghal and Sternberg, 2003; Wang et al., 2004a; Yoda et al., 2005)           |
| MED23             | Larval lethal, vulval development                                   | Mutation      | (Singh and Han, 1995)                                                         |
| <b>Xenopus</b>    |                                                                     |               |                                                                               |
| MED15             | Mesendoderm development                                             | MO            | (Kato et al., 2002)                                                           |

MO, morphant.

expression, and they do not complete gastrulation (Rocha et al., 2010).

*Med21* KO mice, on the other hand, die as early as the blastocyst stage (Tudor et al., 1999). In addition, mouse ESCs harboring a *Med21* deletion do not survive, consistent with the requirement of *Srb7*, which is the yeast homolog of MED21, for Pol II binding and genome-wide gene expression (Chao et al., 1996), suggesting an important role for MED21 in the overall structure and function of Mediator. Therefore, MED21 is essential for cell viability and early embryonic development.

The development of *Med23* null embryos is delayed, and mutant embryos die between E9 and E10.5. All three germ layers develop in these mutant embryos and early organogenesis is initiated before death, which is likely to result from systemic circulatory failure (Balamotis et al., 2009). In contrast to *Med21*, *Med23* null ESCs survive well, and only the expression of a small subset of genes is changed (Stevens et al., 2002; Wang et al., 2005). The genetic ablation of mouse *Med24* revealed that it is not essential for cell viability; however, *Med24* null mice die at an early developmental stage, between E8.5 and E10.5, with severe hypoplasia (Ito et al., 2002). Specifically, yolk sac hematopoiesis is partially blocked, cardiac hypoplasia causes severe heart failure, vessels are ill developed, and the development of the central nervous system is abnormal. These results indicate that the phenotypic severity of *Med24* null embryos, which lack the submodule consisting of MED24, MED23 and MED16 (Ito et al., 2002; Stevens et al., 2002), is intermediate between that of the *Med1* and *Med21* mutations.

A mutation in the mouse *Med31* gene was identified from a screen assay. These mice were rarely recovered after E16.5, indicating late-gestation lethality (Risley et al., 2010). These *Med31* mutant embryos have fewer proliferating cells in the forelimb buds and display delayed chondrogenesis due to a lack of *Sox9* and *Col2a1* expression. In addition, embryonic fibroblast cells derived from the mutant embryos show a severe proliferation defect.

The kinase subunits of Mediator have also been targeted. Heterozygous mice harboring an inactivating gene trap insertion at the *Cdk8* locus have no phenotype (Westerling et al., 2007), but intercrossing these mice failed to produce homozygous *Cdk8* null offspring. Developmental analysis demonstrated embryonic lethality of the homozygous mice at E2.5 to E3.0, prior to implantation; the

*Cdk8* null embryos have fragmented blastomeres and do not proceed to compaction (Westerling et al., 2007), suggesting an essential role of CDK8 in cell viability and early development.

In summary, although all MED KO mice are embryonic lethal, they die at different developmental stages with distinctive phenotypes, suggesting important and specific roles for individual Mediator subunits during development.

#### Mediating adipocyte differentiation: MED1, MED14 and MED23

The gene KO studies discussed above suggest that all Mediator subunits play essential roles in many aspects of embryonic development. Adipocyte differentiation is a good example of a developmental pathway that is regulated by Mediator. Three subunits of the Mediator complex, namely MED1, MED14 and MED23, are involved in regulating the differentiation of pre-adipocytes, acting via different mechanisms and at different stages. The analysis of MEFs derived from *Med1* KO mice revealed that MED1 is essential for PPAR $\gamma$ -driven adipogenesis but not MyoD-driven myogenesis (Ge et al., 2002). MED1 can interact with the C-terminal AF2 domain of many nuclear receptors, including PPAR $\gamma$ , through its LXXLL motif in a ligand-dependent manner (Zhu et al., 1997; Yuan et al., 1998). Unexpectedly, the expression of a mutant form of MED1 that lacks the LXXLL motif (and hence does not bind to PPAR $\gamma$  *in vitro*) in *Med1* null MEFs is sufficient to rescue PPAR $\gamma$ -driven adipogenesis, suggesting an LXXLL motif-independent mechanism of PPAR $\gamma$  recruitment to adipogenic genes (Ge et al., 2008). Further experiments revealed that MED14 can interact with the N-terminal AF1 domain of PPAR $\gamma$  independently of its ligand, suggesting that MED14 acts as an anchor for recruiting Mediator to PPAR $\gamma$  (Grøntved et al., 2010), which might also explain why the LXXLL MED1 mutant can rescue adipogenesis.

Insulin signaling also plays a crucial role in promoting adipogenesis, but the mechanism by which insulin signaling is transmitted to the adipogenic transcription cascade has remained unclear. Studies in our laboratory have revealed that MED23 and its binding to the transcription factor Elk1 are the missing links at this early differentiation stage. *Med23* KO or *Med23* knockdown in MEFs, adipocyte-derived stem cells, 3T3L1 cells and 10T1/2 cells inhibits hormone-induced adipogenesis (Wang et al., 2009; Yin et

al., 2012). In the absence of Elk1 or MED23, *Krox20* (also known as *Egr2*), a rapid-response gene that is stimulated by insulin during adipogenesis, becomes uninducible, and overexpressing *Krox20* in MED23-deficient cells can rescue the adipogenetic defect. These observations suggest that MED23 plays a role at an earlier stage of adipogenesis by linking insulin signaling to the adipogenetic transcription cascade. These studies also support the notion that key lineage regulators control lineage-specific gene programs by targeting different subunits of Mediator, and that different Mediator subunits can also play distinct roles at different stages to assure proper lineage development.

#### Mediating neuronal differentiation: MED12, MED13, MED19 and MED26

Many human diseases are associated with neural degeneration, and this has prompted mechanistic studies of neural fate determination and maintenance. Recently, several subunits of the Mediator complex have been associated with neuronal gene expression and disease. As mentioned above, the neuronal-specific transcriptional repressor REST recruits the Mediator complex for neuronal gene suppression through its interaction with MED19 and MED26 (Fig. 1) (Ding et al., 2009). This suppression occurs via recruitment of the histone H3K9 methyltransferase G9a by the REST-MED19/26-MED12-G9a complex to neuronal gene promoters. Furthermore, *Med12* mutant mice show severe defects in neural tube closure (Rocha et al., 2010). Med12 was also identified in a large-scale genetic screen of mutant zebrafish exhibiting deficient neuronal development (Wang et al., 2006). Another screen for mutant zebrafish resembling the double-mutant phenotype of *Sox9a/Sox9b* (two key factors for neural crest development) also identified Med12 (Rau et al., 2006). Studies on MED12 and MED13 (also known as Kohtalo and Skuld) have also been carried out in *Drosophila* (see Table 3), where they play a role in retinal, wing and crystal cell development.

#### Mediating smooth muscle differentiation: MED23 and MED28

A previous study revealed the function of the MED28 subunit in smooth muscle development (Fig. 1). Knockdown of MED28 in NIH3T3 and myoblast C2C12 cells leads to upregulation of smooth muscle genes, whereas overexpression of MED28 represses the expression of these genes (Beyer et al., 2007). A head- or CDK8 module-related repression function was postulated, but the detailed mechanism underlying this regulation is not clear. *MED28* was previously identified as an endothelial cell gene and was named endothelial-derived gene EG-1 (Liu et al., 2002). Later, it was identified as a protein that interacts with the cytoskeletal protein merlin, localizes beneath the plasma membrane, and interacts with the actin cytoskeleton (Wiederhold et al., 2004). These observations suggest that MED28 might regulate smooth muscle gene expression

through a cytoplasmic monomer isoform, not as a Mediator component.

Another subunit involved in smooth muscle differentiation is MED23. Our previous finding that MED23 depletion prevents adipogenesis (Wang et al., 2009) led us to investigate the effects of MED23 depletion from precursor cells on subsequent cell fate. The results of this study demonstrated that MED23-depleted mesenchymal stem cells are prone to differentiation into smooth muscle cells (Yin et al., 2012). This type of ‘Yin-Yang’ regulation of adipogenesis and smooth muscle differentiation by MED23 has been examined in multiple cell types, such as MEFs, 10T1/2 cells and adipocyte stem cells (Fig. 1). Our recent study has demonstrated that MED23 controls the balance between Ras/ELK1 and RhoA/MAL signaling, which control adipogenetic and smooth muscle gene expression, respectively, thus oppositely directing the two distinct cell lineages (Yin et al., 2012). The possible relationship between MED23 and MED28 in smooth muscle differentiation remains to be investigated further.

#### Mediating chondrogenesis: MED12, MED25 and MED31

*Sox9* is a transcriptional activator of cartilage-specific extracellular matrix genes (Lefebvre and de Crombrughe, 1998). As such, it plays essential roles in chondrogenesis. It has been shown that MED12 functions as a co-factor of *Sox9* and plays an important role in craniofacial chondrogenesis/endochondral bone formation during zebrafish development (Zhou et al., 2002). Recently, MED25 was found to be another direct target of *Sox9*, and morpholino-mediated knockdown of *Med25* in zebrafish resulted in palatal malformation similar to that observed in *sox9* mutants (Nakamura et al., 2011). *Med31* mutant mice exhibit normal limb bud patterning but experience delayed chondrogenesis due to a lack of *Col2a1* and *Sox9* expression (Risley et al., 2010). Taken together, it appears that different Mediator subunits are able to function either upstream or downstream of the key transcription factor *Sox9* to regulate chondrogenesis.

#### Human diseases related to Mediator function

Many mutations in Mediator subunits have been associated with human diseases (Table 4). For example, the missense mutations R961W and N1007S in *MED12*, which disrupt the interaction between MED12 and the transcription repressor REST, are responsible for both FG syndrome and Lujan syndrome, two X-linked genetic disorders characterized by intellectual disability (Ding et al., 2008). Another mutation related to neurological disorders is an R617Q mutation in *MED23*, which co-segregates with nonsyndromic autosomal recessive intellectual disability in families. This mutation specifically impairs the response of JUN and FOS immediate early genes to serum stimulation in patient-derived skin fibroblasts (Hashimoto et al., 2011). A summary of other studies of

**Table 4. Mutations in Mediator subunits and their related human diseases**

| Mediator subunit | Disease/phenotype                                                  | Genetic state/mutation                      | References                        |
|------------------|--------------------------------------------------------------------|---------------------------------------------|-----------------------------------|
| MED12            | FG intellectual disability syndrome                                | R961W mutation                              | (Risheg et al., 2007)             |
|                  | Lujan intellectual disability syndromes                            | N1007S mutation                             | (Schwartz et al., 2007)           |
|                  | Uterine leiomyomas                                                 | Distinct mutations in exon 2                | (Makinen et al., 2011)            |
|                  | Ohdo syndrome                                                      | Distinct missense mutations                 | (Vulto-van Silfhout et al., 2013) |
| MED13L           | Transposition of the great arteries                                | Distinct missense mutations                 | (Muncke et al., 2003)             |
| MED15            | DiGeorge syndrome (DGS)/velocardiofacial syndrome (VCFS)           | Chromosomal deletion including <i>MED15</i> | (Berti et al., 2001)              |
| MED17            | Infantile cerebral and cerebellar atrophy                          | L371P mutation                              | (Kaufmann et al., 2010)           |
| MED23            | Nonsyndromic autosomal recessive intellectual disability           | R617Q mutation                              | (Hashimoto et al., 2011)          |
| MED25            | Charcot-Marie-Tooth disease                                        | A335V mutation                              | (Leal et al., 2009)               |
| CDK19            | Congenital retinal folds, microcephaly and intellectual disability | Pericentric inversion                       | (Mukhopadhyay et al., 2010)       |

neurological disease-related mutations in Mediator subunits can be found in Table 4.

Mediator mutations have also been associated with congenital heart disease. For example, *MED15* is deleted in patients with DiGeorge syndrome (Berti et al., 2001), which is associated with various cardiovascular abnormalities. *MED13L* is interrupted in patients with chromosomal translocations, who display transposition of the great arteries (TGA) and intellectual disability, suggesting that *MED13L* is involved both in early heart and brain development (Muncke et al., 2003).

Changes in the level of Mediator expression are also frequently reported in diseases such as cancer. For example, *MED23* is significantly overexpressed in lung cancer cell lines and clinical lung cancer samples with hyperactive RAS activities, whereas a lower *MED23* expression level predicts better survival in RAS-active lung cancer patients (Yang et al., 2012), suggesting that the *MED23* subunit might serve as a therapeutic target as well as a diagnostic marker for RAS-active cancers. Interestingly, *MED15* is highly expressed in clinical breast cancer tissues, correlated with hyperactive transforming growth factor  $\beta$  (TGF $\beta$ ) signaling, as indicated by SMAD3 phosphorylation (Zhao et al., 2013). Moreover, *MED15* deficiency decreased the metastatic potential of a highly aggressive breast cancer cell line by attenuating TGF $\beta$ /Smad signaling. Interestingly, heterozygous mutations in exon 2 of the *MED12* gene have been described in 50-70% of uterine leiomyomas (Mäkinen et al., 2011). Overall, different Mediator components appear to control distinct types and stages of cancer development through distinct signaling pathways.

## Conclusions

Mediator is an evolutionarily conserved protein complex with a large surface mediating diverse and dynamic protein-protein interactions. In addition to binding to an array of transcription factors, Mediator interacts with diverse co-factors and complexes as well as lincRNAs. Consequently, in addition to its classic role in establishing the pre-initiation complex, Mediator plays diverse roles at multiple stages of transcription, including elongation, termination, mRNA processing and epigenetic regulation. Mediator functions together with cohesin to establish the super enhancer loop for gene activation, which is important for cell identity. Therefore, Mediator can be considered as a master coordinator, orchestrating diverse developmental signaling and master regulators to specify distinct cell fates. It should be noted that the term ‘master coordinator’ is different to ‘master regulator’ in the sense that a master regulator is a driving force for cell lineage development, whereas a master coordinator just assists the master regulator in doing its job. In contrast to master regulators, the overexpression of a master coordinator (e.g. a Mediator subunit) cannot drive cell differentiation. Overall, as a master coordinator, Mediator coordinates transcription and cell lineage specification/development to ensure that the correct genes are expressed at the right time and place and with the necessary intensity and duration.

Our understanding of the molecular and developmental regulation of the Mediator complex has been greatly expanded in recent years. However, many questions remain. For example, what is the exact mechanism by which Mediator coordinates multiple transcription factors and co-factors? How is the dynamic composition and configuration of Mediator regulated in different conditions, cells and tissues? What are the relationships between Mediator and diverse chromosomal modifiers/remodelers? Among the many uncertainties, it is apparent that the identification of new capabilities of Mediator is inevitable.

Although KO mice for several Mediator subunits have been generated, their early or late embryonic lethality has prevented further investigation of the function of these subunits later in development. The detailed analysis of different subunits in development might thus require tissue-, cell type- or stage-specific KO mouse models. Furthermore, combining knock-in mouse models with known disease-related mutations might provide an in-depth understanding of how mutations within particular Mediator components are linked to various diseases.

## Acknowledgements

We apologize that we cannot accommodate all the related references owing to space limitations.

## Competing interests

The authors declare no competing financial interests.

## Funding

The authors' research is supported by grants from the Chinese Academy of Sciences (CAS), China Ministry of Science and Technology and Chinese Natural Science Foundation to G.W., and China Postdoctoral Science Foundation to J.Y. G.W. is a scholar of CAS 'Hundred Talents' program.

## References

- Adelman, K. and Lis, J. T. (2012). Promoter-proximal pausing of RNA polymerase II: emerging roles in metazoans. *Nat. Rev. Genet.* **13**, 720-731.
- Akoulitchev, S., Chuikov, S. and Reinberg, D. (2000). TFIIB is negatively regulated by cdk8-containing mediator complexes. *Nature* **407**, 102-106.
- Apostolou, E., Ferrari, F., Walsh, R. M., Bar-Nur, O., Stadtfeld, M., Cheloufi, S., Stuart, H. T., Polo, J. M., Ohsumi, T. K., Borowsky, M. L. et al. (2013). Genome-wide chromatin interactions of the Nanog locus in pluripotency, differentiation, and reprogramming. *Cell Stem Cell* **12**, 699-712.
- Asada, S., Choi, Y., Yamada, M., Wang, S. C., Hung, M. C., Qin, J. and Uesugi, M. (2002). External control of Her2 expression and cancer cell growth by targeting a Ras-linked coactivator. *Proc. Natl. Acad. Sci. USA* **99**, 12747-12752.
- Atkins, G. B., Hu, X., Guenther, M. G., Rachez, C., Freedman, L. P. and Lazar, M. A. (1999). Coactivators for the orphan nuclear receptor ROR $\alpha$ . *Mol. Endocrinol.* **13**, 1550-1557.
- Balamotis, M. A., Pennella, M. A., Stevens, J. L., Wasyluk, B., Belmont, A. S. and Berk, A. J. (2009). Complexity in transcription control at the activation domain-mediator interface. *Sci. Signal.* **2**, ra20.
- Berti, L., Mittler, G., Przemec, G. K., Stelzer, G., Günzler, B., Amati, F., Conti, E., Dallapiccola, B., Hrabé de Angelis, M., Novelli, G. et al. (2001). Isolation and characterization of a novel gene from the DiGeorge chromosomal region that encodes for a mediator subunit. *Genomics* **74**, 320-332.
- Beyer, K. S., Beauchamp, R. L., Lee, M. F., Gusella, J. F., Näär, A. M. and Ramesh, V. (2007). Mediator subunit MED28 (Magicin) is a repressor of smooth muscle cell differentiation. *J. Biol. Chem.* **282**, 32152-32157.
- Biddick, R. and Young, E. T. (2005). Yeast mediator and its role in transcriptional regulation. *C. R. Biol.* **328**, 773-782.
- Björklund, S. and Gustafsson, C. M. (2005). The yeast Mediator complex and its regulation. *Trends Biochem. Sci.* **30**, 240-244.
- Bosveld, F., van Hoek, S. and Sibon, O. C. (2008). Establishment of cell fate during early Drosophila embryogenesis requires transcriptional Mediator subunit dMED31. *Dev. Biol.* **313**, 802-813.
- Bourbon, H. M., Aguilera, A., Ansari, A. Z., Asturias, F. J., Berk, A. J., Björklund, S., Blackwell, T. K., Borggreffe, T., Carey, M., Carlson, M. et al. (2004). A unified nomenclature for protein subunits of mediator complexes linking transcriptional regulators to RNA polymerase II. *Mol. Cell* **14**, 553-557.
- Boyer, T. G., Martin, M. E., Lees, E., Ricciardi, R. P. and Berk, A. J. (1999). Mammalian Srb/Mediator complex is targeted by adenovirus E1A protein. *Nature* **399**, 276-279.
- Carlsten, J. O., Zhu, X. and Gustafsson, C. M. (2013). The multitasking Mediator complex. *Trends Biochem. Sci.* **38**, 531-537.
- Carrera, I., Janody, F., Leeds, N., Duveau, F. and Treisman, J. E. (2008). Pygopus activates Wingless target gene transcription through the mediator complex subunits Med12 and Med13. *Proc. Natl. Acad. Sci. USA* **105**, 6644-6649.
- Chao, D. M., Gadbois, E. L., Murray, P. J., Anderson, S. F., Sonu, M. S., Parvin, J. D. and Young, R. A. (1996). A mammalian SRB protein associated with an RNA polymerase II holoenzyme. *Nature* **380**, 82-85.
- Crawford, S. E., Qi, C., Misra, P., Stellmach, V., Rao, M. S., Engel, J. D., Zhu, Y. and Reddy, J. K. (2002). Defects of the heart, eye, and megakaryocytes in peroxisome proliferator activator receptor-binding protein (PBP) null embryos implicate GATA family of transcription factors. *J. Biol. Chem.* **277**, 3585-3592.
- Dambacher, S., de Almeida, G. P. and Schotta, G. (2013). Dynamic changes of the epigenetic landscape during cellular differentiation. *Epigenomics* **5**, 701-713.
- Davis, R. L., Weintraub, H. and Lassar, A. B. (1987). Expression of a single transfected cDNA converts fibroblasts to myoblasts. *Cell* **51**, 987-1000.



- Ding, N., Zhou, H., Esteve, P. O., Chin, H. G., Kim, S., Xu, X., Joseph, S. M., Friez, M. J., Schwartz, C. E., Pradhan, S. et al. (2008). Mediator links epigenetic silencing of neuronal gene expression with x-linked mental retardation. *Mol. Cell* **31**, 347-359.
- Ding, N., Tomomori-Sato, C., Sato, S., Conaway, R. C., Conaway, J. W. and Boyer, T. G. (2009). MED19 and MED26 are synergistic functional targets of the RE1 silencing transcription factor in epigenetic silencing of neuronal gene expression. *J. Biol. Chem.* **284**, 2648-2656.
- Donner, A. J., Ebmeier, C. C., Taatjes, D. J. and Espinosa, J. M. (2010). CDK8 is a positive regulator of transcriptional elongation within the serum response network. *Nat. Struct. Mol. Biol.* **17**, 194-201.
- Dorsett, D. (2011). Cohesin: genomic insights into controlling gene transcription and development. *Curr. Opin. Genet. Dev.* **21**, 199-206.
- Drané, P., Barel, M., Balbo, M. and Frade, R. (1997). Identification of RB18A, a 205 kDa new p53 regulatory protein which shares antigenic and functional properties with p53. *Oncogene* **15**, 3013-3024.
- Eberhardy, S. R. and Farnham, P. J. (2002). Myc recruits P-TEFb to mediate the final step in the transcriptional activation of the cad promoter. *J. Biol. Chem.* **277**, 40156-40162.
- Galbraith, M. D., Allen, M. A., Bensard, C. L., Wang, X., Schwinn, M. K., Qin, B., Long, H. W., Daniels, D. L., Hahn, W. C., Dowell, R. D. et al. (2013). HIF1A employs CDK8-mediator to stimulate RNAPII elongation in response to hypoxia. *Cell* **153**, 1327-1339.
- Garrett-Engle, C. M., Siegal, M. L., Manoli, D. S., Williams, B. C., Li, H. and Baker, B. S. (2002). *intersex*, a gene required for female sexual development in *Drosophila*, is expressed in both sexes and functions together with doublesex to regulate terminal differentiation. *Development* **129**, 4661-4675.
- Ge, K., Guermah, M., Yuan, C. X., Ito, M., Wallberg, A. E., Spiegelman, B. M. and Roeder, R. G. (2002). Transcription coactivator TRAP220 is required for PPAR gamma 2-stimulated adipogenesis. *Nature* **417**, 563-567.
- Ge, K., Cho, Y. W., Guo, H., Hong, T. B., Guermah, M., Ito, M., Yu, H., Kalkum, M. and Roeder, R. G. (2008). Alternative mechanisms by which mediator subunit MED1/TRAP220 regulates peroxisome proliferator-activated receptor gamma-stimulated adipogenesis and target gene expression. *Mol. Cell. Biol.* **28**, 1081-1091.
- Gim, B. S., Park, J. M., Yoon, J. H., Kang, C. and Kim, Y. J. (2001). *Drosophila* Med6 is required for elevated expression of a large but distinct set of developmentally regulated genes. *Mol. Cell. Biol.* **21**, 5242-5255.
- Gordon, D. F., Tucker, E. A., Tundwal, K., Hall, H., Wood, W. M. and Ridgway, E. C. (2006). MED220/thyroid receptor-associated protein 220 functions as a transcriptional coactivator with Pit-1 and GATA-2 on the thyrotropin-beta promoter in thyrotropes. *Mol. Endocrinol.* **20**, 1073-1089.
- Grøntved, L., Madsen, M. S., Boergesen, M., Roeder, R. G. and Mandrup, S. (2010). MED14 tethers mediator to the N-terminal domain of peroxisome proliferator-activated receptor gamma and is required for full transcriptional activity and adipogenesis. *Mol. Cell. Biol.* **30**, 2155-2169.
- Gwack, Y., Baek, H. J., Nakamura, H., Lee, S. H., Meisterernst, M., Roeder, R. G. and Jung, J. U. (2003). Principal role of TRAP/mediator and SWI/SNF complexes in Kaposi's sarcoma-associated herpesvirus RTA-mediated lytic reactivation. *Mol. Cell. Biol.* **23**, 2055-2067.
- Hashimoto, S., Boissel, S., Zarhrate, M., Rio, M., Munnich, A., Egly, J. M. and Colleaux, L. (2011). MED23 mutation links intellectual disability to dysregulation of immediate early gene expression. *Science* **333**, 1161-1163.
- Hengartner, C. J., Myer, V. E., Liao, S. M., Wilson, C. J., Koh, S. S. and Young, R. A. (1998). Temporal regulation of RNA polymerase II by Srb10 and Kin28 cyclin-dependent kinases. *Mol. Cell* **2**, 43-53.
- Hittelman, A. B., Burakov, D., Iñiguez-Lluhi, J. A., Freedman, L. P. and Garabedian, M. J. (1999). Differential regulation of glucocorticoid receptor transcriptional activation via AF-1-associated proteins. *EMBO J.* **18**, 5380-5388.
- Hong, S. K., Haldin, C. E., Lawson, N. D., Weinstein, B. M., Dawid, I. B. and Hukriede, N. A. (2005). The zebrafish *kohtalo/trap230* gene is required for the development of the brain, neural crest, and pronephric kidney. *Proc. Natl. Acad. Sci. USA* **102**, 18473-18478.
- Huang, P., He, Z., Ji, S., Sun, H., Xiang, D., Liu, C., Hu, Y., Wang, X. and Hui, L. (2011). Induction of functional hepatocyte-like cells from mouse fibroblasts by defined factors. *Nature* **475**, 386-389.
- Huang, Y., Li, W., Yao, X., Lin, Q. J., Yin, J. W., Liang, Y., Heiner, M., Tian, B., Hui, J. and Wang, G. (2012). Mediator complex regulates alternative mRNA processing via the MED23 subunit. *Mol. Cell* **45**, 459-469.
- Ieda, M., Fu, J. D., Delgado-Olguin, P., Vedantham, V., Hayashi, Y., Bruneau, B. G. and Srivastava, D. (2010). Direct reprogramming of fibroblasts into functional cardiomyocytes by defined factors. *Cell* **142**, 375-386.
- Ito, M., Yuan, C. X., Malik, S., Gu, W., Fondelli, J. D., Yamamura, S., Fu, Z. Y., Zhang, X., Qin, J. and Roeder, R. G. (1999). Identity between TRAP and SMCC complexes indicates novel pathways for the function of nuclear receptors and diverse mammalian activators. *Mol. Cell* **3**, 361-370.
- Ito, M., Yuan, C. X., Okano, H. J., Darnell, R. B. and Roeder, R. G. (2000). Involvement of the TRAP220 component of the TRAP/SMCC coactivator complex in embryonic development and thyroid hormone action. *Mol. Cell* **5**, 683-693.
- Ito, M., Okano, H. J., Darnell, R. B. and Roeder, R. G. (2002). The TRAP100 component of the TRAP/Mediator complex is essential in broad transcriptional events and development. *EMBO J.* **21**, 3464-3475.
- Janody, F., Martirosyan, Z., Benlali, A. and Treisman, J. E. (2003). Two subunits of the *Drosophila* mediator complex act together to control cell affinity. *Development* **130**, 3691-3701.
- Jiang, Y. W., Veschambre, P., Erdjument-Bromage, H., Tempst, P., Conaway, J. W., Conaway, R. C. and Kornberg, R. D. (1998). Mammalian mediator of transcriptional regulation and its possible role as an end-point of signal transduction pathways. *Proc. Natl. Acad. Sci. USA* **95**, 8538-8543.
- Jiang, P., Hu, Q., Ito, M., Meyer, S., Waltz, S., Khan, S., Roeder, R. G. and Zhang, X. (2010). Key roles for MED1 LxxLL motifs in pubertal mammary gland development and luminal-cell differentiation. *Proc. Natl. Acad. Sci. USA* **107**, 6765-6770.
- Kagey, M. H., Newman, J. J., Bilodeau, S., Zhan, Y., Orlando, D. A., van Berkum, N. L., Ebmeier, C. C., Goossens, J., Rahl, P. B., Levine, S. S. et al. (2010). Mediator and cohesin connect gene expression and chromatin architecture. *Nature* **467**, 430-435.
- Kang, Y. K., Guermah, M., Yuan, C. X. and Roeder, R. G. (2002). The TRAP/Mediator coactivator complex interacts directly with estrogen receptors alpha and beta through the TRAP220 subunit and directly enhances estrogen receptor function in vitro. *Proc. Natl. Acad. Sci. USA* **99**, 2642-2647.
- Kato, Y., Habas, R., Katsuyama, Y., Näär, A. M. and He, X. (2002). A component of the ARC/Mediator complex required for TGF beta/Nodal signalling. *Nature* **418**, 641-646.
- Kaufmann, R., Straussberg, R., Mandel, H., Fattal-Valevski, A., Ben-Zeev, B., Naamati, A., Shaag, A., Zenvirt, S., Konen, O., Mimouni-Bloch, A. et al. (2010). Infantile cerebral and cerebellar atrophy is associated with a mutation in the MED17 subunit of the transcription preinitiation mediator complex. *Am. J. Hum. Genet.* **87**, 667-670.
- Kelleher, R. J., 3rd, Flanagan, P. M. and Kornberg, R. D. (1990). A novel mediator between activator proteins and the RNA polymerase II transcription apparatus. *Cell* **61**, 1209-1215.
- Kim, Y. J., Björklund, S., Li, Y., Sayre, M. H. and Kornberg, R. D. (1994). A multiprotein mediator of transcriptional activation and its interaction with the C-terminal repeat domain of RNA polymerase II. *Cell* **77**, 599-608.
- Kim, T. W., Kwon, Y. J., Kim, J. M., Song, Y. H., Kim, S. N. and Kim, Y. J. (2004). MED16 and MED23 of Mediator are coactivators of lipopolysaccharide- and heat-shock-induced transcriptional activators. *Proc. Natl. Acad. Sci. USA* **101**, 12153-12158.
- Kim, S., Xu, X., Hecht, A. and Boyer, T. G. (2006). Mediator is a transducer of Wnt/beta-catenin signaling. *J. Biol. Chem.* **281**, 14066-14075.
- Kingston, R. E. (1999). A shared but complex bridge. *Nature* **399**, 199-200.
- Komori, T. (2002). Cbfa1/Runx2, an essential transcription factor for the regulation of osteoblast differentiation. *Nihon Rinsho* **60 Suppl.** **3**, 91-97.
- Lai, F., Orom, U. A., Cesaroni, M., Beringer, M., Taatjes, D. J., Blobel, G. A. and Shiekhattar, R. (2013). Activating RNAs associate with Mediator to enhance chromatin architecture and transcription. *Nature* **494**, 497-501.
- Landles, C., Chalk, S., Steel, J. H., Rosewell, I., Spencer-Dene, B., Lalani, N. and Parker, M. G. (2003). The thyroid hormone receptor-associated protein TRAP220 is required at distinct embryonic stages in placental, cardiac, and hepatic development. *Mol. Endocrinol.* **17**, 2418-2435.
- Larivière, L., Seizl, M. and Cramer, P. (2012). A structural perspective on Mediator function. *Curr. Opin. Cell Biol.* **24**, 305-313.
- Lau, J. F., Nusinzon, I., Burakov, D., Freedman, L. P. and Horvath, C. M. (2003). Role of metazoan mediator proteins in interferon-responsive transcription. *Mol. Cell. Biol.* **23**, 620-628.
- Leal, A., Huehne, K., Bauer, F., Sticht, H., Berger, P., Suter, U., Morera, B., Del Valle, G., Lupski, J. R., Kicic, A. et al. (2009). Identification of the variant Ala335Val of MED25 as responsible for CMT2B2: molecular data, functional studies of the SH3 recognition motif and correlation between wild-type MED25 and PMP22 RNA levels in CMT1A animal models. *Neurogenetics* **10**, 275-287.
- Lee, J. E., Kim, K., Sacchettini, J. C., Smith, C. V. and Safe, S. (2005). DRIP150 coactivation of estrogen receptor alpha in ZR-75 breast cancer cells is independent of LXXLL motifs. *J. Biol. Chem.* **280**, 8819-8830.
- Lee, H. K., Park, U. H., Kim, E. J. and Um, S. J. (2007). MED25 is distinct from TRAP220/MED1 in cooperating with CBP for retinoid receptor activation. *EMBO J.* **26**, 3545-3557.
- Lefebvre, V. and de Crombrughe, B. (1998). Toward understanding SOX9 function in chondrocyte differentiation. *Matrix Biol.* **16**, 529-540.
- Li, H., Gade, P., Nallar, S. C., Raha, A., Roy, S. K., Karra, S., Reddy, J. K., Reddy, S. P. and Kalvakolanu, D. V. (2008). The Med1 subunit of transcriptional mediator plays a central role in regulating CCAAT/enhancer-binding protein-beta-driven transcription in response to interferon-gamma. *J. Biol. Chem.* **283**, 13077-13086.
- Lim, J., Lee, O. K., Hsu, Y. C., Singh, A. and Choi, K. W. (2007). *Drosophila* TRAP230/240 are essential coactivators for Atonal in retinal neurogenesis. *Dev. Biol.* **308**, 322-330.
- Liu, C., Zhang, L., Shao, Z. M., Beatty, P., Sartippour, M., Lane, T. F., Barsky, S. H., Livingston, E. and Nguyen, M. (2002). Identification of a novel endothelial-derived gene EG-1. *Biochem. Biophys. Res. Commun.* **290**, 602-612.
- Loncle, N., Boube, M., Joulia, L., Boschiero, C., Werner, M., Cribbs, D. L. and Bourbon, H. M. (2007). Distinct roles for Mediator Cdk8 module subunits in *Drosophila* development. *EMBO J.* **26**, 1045-1054.
- Mäkinen, N., Mehine, M., Tolvanen, J., Kaasinen, E., Li, Y., Lehtonen, H. J., Gentile, M., Yan, J., Enge, M., Taipale, M. et al. (2011). MED12, the mediator complex subunit 12 gene, is mutated at high frequency in uterine leiomyomas. *Science* **334**, 252-255.
- Malik, S. and Roeder, R. G. (2005). Dynamic regulation of pol II transcription by the mammalian Mediator complex. *Trends Biochem. Sci.* **30**, 256-263.
- Malik, S. and Roeder, R. G. (2010). The metazoan Mediator co-activator complex as an integrative hub for transcriptional regulation. *Nat. Rev. Genet.* **11**, 761-772.
- Malik, S., Gu, W., Wu, W., Qin, J. and Roeder, R. G. (2000). The USA-derived transcriptional coactivator PC2 is a submodule of TRAP/SMCC and acts synergistically with other PCs. *Mol. Cell* **5**, 753-760.

- Malik, S., Wallberg, A. E., Kang, Y. K. and Roeder, R. G. (2002). TRAP/SMCC/mediator-dependent transcriptional activation from DNA and chromatin templates by orphan nuclear receptor hepatocyte nuclear factor 4. *Mol. Cell. Biol.* **22**, 5626-5637.
- Mauldin, J. P., Lu, M., Das, S., Park, D., Ernst, P. B. and Ravichandran, K. S. (2013). A link between the cytoplasmic engulfment protein Elmo1 and the Mediator complex subunit Med31. *Curr. Biol.* **23**, 162-167.
- Meyer, K. D., Lin, S. C., Bernecky, C., Gao, Y. and Taatjes, D. J. (2010). p53 activates transcription by directing structural shifts in Mediator. *Nat. Struct. Mol. Biol.* **17**, 753-760.
- Mittler, G., Stühler, T., Santolin, L., Uhlmann, T., Kremmer, E., Lottspeich, F., Berti, L. and Meisterernst, M. (2003). A novel docking site on Mediator is critical for activation by VP16 in mammalian cells. *EMBO J.* **22**, 6494-6504.
- Mo, X., Kowenz-Leutz, E., Xu, H. and Leutz, A. (2004). Ras induces mediator complex exchange on C/EBP beta. *Mol. Cell.* **13**, 241-250.
- Moghal, N. and Sternberg, P. W. (2003). A component of the transcriptional mediator complex inhibits RAS-dependent vulval fate specification in *C. elegans*. *Development* **130**, 57-69.
- Mukhopadhyay, A., Kramer, J. M., Merckx, G., Lugtenberg, D., Smeets, D. F., Oortveld, M. A., Blokland, E. A., Agrawal, J., Schenck, A., van Bokhoven, H. et al. (2010). CDK19 is disrupted in a female patient with bilateral congenital retinal folds, microcephaly and mild mental retardation. *Hum. Genet.* **128**, 281-291.
- Mukundan, B. and Ansari, A. (2011). Novel role for mediator complex subunit Srb5/Med18 in termination of transcription. *J. Biol. Chem.* **286**, 37053-37057.
- Muncke, N., Jung, C., Rüdiger, H., Ulmer, H., Roeth, R., Hubert, A., Goldmuntz, E., Driscoll, D., Goodship, J., Schön, K. et al. (2003). Missense mutations and gene interruption in PROSIT240, a novel TRAP240-like gene, in patients with congenital heart defect (transposition of the great arteries). *Circulation* **108**, 2843-2850.
- Näär, A. M., Beaurang, P. A., Zhou, S., Abraham, S., Solomon, W. and Tjian, R. (1999). Composite co-activator ARC mediates chromatin-directed transcriptional activation. *Nature* **398**, 828-832.
- Nakamura, Y., Yamamoto, K., He, X., Otsuki, B., Kim, Y., Murao, H., Soeda, T., Tsumaki, N., Deng, J. M., Zhang, Z. et al. (2011). Wwp2 is essential for palatogenesis mediated by the interaction between Sox9 and mediator subunit 25. *Nat. Commun.* **2**, 251.
- Nevado, J., Tenbaum, S. P. and Aranda, A. (2004). hSrb7, an essential human Mediator component, acts as a coactivator for the thyroid hormone receptor. *Mol. Cell. Endocrinol.* **222**, 41-51.
- Nonet, M. L. and Young, R. A. (1989). Intragenic and extragenic suppressors of mutations in the heptapeptide repeat domain of *Saccharomyces cerevisiae* RNA polymerase II. *Genetics* **123**, 715-724.
- Oda, Y., Chalkley, R. J., Burlingame, A. L. and Bikle, D. D. (2010). The transcriptional coactivator DRIP/mediator complex is involved in vitamin D receptor function and regulates keratinocyte proliferation and differentiation. *J. Invest. Dermatol.* **130**, 2377-2388.
- Ørom, U. A., Derrien, T., Beringer, M., Gumireddy, K., Gardini, A., Bussotti, G., Lai, F., Zytynicki, M., Notredame, C., Huang, Q. et al. (2010). Long noncoding RNAs with enhancer-like function in human cells. *Cell* **143**, 46-58.
- Park, J. M., Werner, J., Kim, J. M., Lis, J. T. and Kim, Y. J. (2001). Mediator, not holoenzyme, is directly recruited to the heat shock promoter by HSF upon heat shock. *Mol. Cell* **8**, 9-19.
- Park, J. M., Kim, J. M., Kim, L. K., Kim, S. N., Kim-Ha, J., Kim, J. H. and Kim, Y. J. (2003). Signal-induced transcriptional activation by Dif requires the dTRAP80 mediator module. *Mol. Cell. Biol.* **23**, 1358-1367.
- Phillips-Cremmins, J. E., Sauria, M. E., Sanyal, A., Gerasimova, T. I., Lajoie, B. R., Bell, J. S., Ong, C. T., Hookway, T. A., Guo, C., Sun, Y. et al. (2013). Architectural protein subclasses shape 3D organization of genomes during lineage commitment. *Cell* **153**, 1281-1295.
- Pineda Torra, I., Freedman, L. P. and Garabedian, M. J. (2004). Identification of DRIP205 as a coactivator for the Farnesoid X receptor. *J. Biol. Chem.* **279**, 36184-36191.
- Rachez, C., Lemon, B. D., Suldan, Z., Bromleigh, V., Gamble, M., Näär, A. M., Erdjument-Bromage, H., Tempst, P. and Freedman, L. P. (1999). Ligand-dependent transcription activation by nuclear receptors requires the DRIP complex. *Nature* **398**, 824-828.
- Rana, R., Surapureddi, S., Kam, W., Ferguson, S. and Goldstein, J. A. (2011). Med25 is required for RNA polymerase II recruitment to specific promoters, thus regulating xenobiotic and lipid metabolism in human liver. *Mol. Cell. Biol.* **31**, 466-481.
- Rau, M. J., Fischer, S. and Neumann, C. J. (2006). Zebrafish Trap230/Med12 is required as a coactivator for Sox9-dependent neural crest, cartilage and ear development. *Dev. Biol.* **296**, 83-93.
- Remeseiro, S., Cuadrado, A. and Losada, A. (2013). Cohesin in development and disease. *Development* **140**, 3715-3718.
- Risheg, H., Graham, J. M., Jr, Clark, R. D., Rogers, R. C., Opitz, J. M., Moeschler, J. B., Peiffer, A. P., May, M., Joseph, S. M., Jones, J. R. et al. (2007). A recurrent mutation in MED12 leading to R961W causes Opitz-Kaveggia syndrome. *Nat. Genet.* **39**, 451-453.
- Risley, M. D., Clowes, C., Yu, M., Mitchell, K. and Hentges, K. E. (2010). The Mediator complex protein Med31 is required for embryonic growth and cell proliferation during mammalian development. *Dev. Biol.* **342**, 146-156.
- Rocha, P. P., Scholze, M., Bleiss, W. and Schrewe, H. (2010). Med12 is essential for early mouse development and for canonical Wnt and Wnt/PCP signaling. *Development* **137**, 2723-2731.
- Ryu, S., Zhou, S., Ladurner, A. G. and Tjian, R. (1999). The transcriptional cofactor complex CRSP is required for activity of the enhancer-binding protein Sp1. *Nature* **397**, 446-450.
- Schwartz, C. E., Tarpey, P. S., Lubs, H. A., Verloes, A., May, M. M., Risheg, H., Friez, M. J., Futreal, P. A., Edkins, S., Teague, J. et al. (2007). The original Lujan syndrome family has a novel missense mutation (p.N1007S) in the MED12 gene. *J. Med. Genet.* **44**, 472-477.
- Sekiya, S. and Suzuki, A. (2011). Direct conversion of mouse fibroblasts to hepatocyte-like cells by defined factors. *Nature* **475**, 390-393.
- Shin, C. H., Chung, W. S., Hong, S. K., Ober, E. A., Verkade, H., Field, H. A., Huiskens, J. and Stainier, D. Y. (2008). Multiple roles for Med12 in vertebrate endoderm development. *Dev. Biol.* **317**, 467-479.
- Singh, N. and Han, M. (1995). sur-2, a novel gene, functions late in the let-60 ras-mediated signaling pathway during *Caenorhabditis elegans* vulval induction. *Genes Dev.* **9**, 2251-2265.
- Stevens, J. L., Cantin, G. T., Wang, G., Shevchenko, A., Shevchenko, A. and Berk, A. J. (2002). Transcription control by E1A and MAP kinase pathway via Sur2 mediator subunit. *Science* **296**, 755-758.
- Stumpf, M., Waskow, C., Krötschel, M., van Essen, D., Rodriguez, P., Zhang, X., Guyot, B., Roeder, R. G. and Borggrete, T. (2006). The mediator complex functions as a coactivator for GATA-1 in erythropoiesis via subunit Med1/TRAP220. *Proc. Natl. Acad. Sci. USA* **103**, 18504-18509.
- Sun, X., Zhang, Y., Cho, H., Rickert, P., Lees, E., Lane, W. and Reinberg, D. (1998). NAT, a human complex containing Srb polypeptides that functions as a negative regulator of activated transcription. *Mol. Cell* **2**, 213-222.
- Szabo, E., Rampalli, S., Risueño, R. M., Schnerch, A., Mitchell, R., Fiebig-Comyn, A., Levadoux-Martin, M. and Bhatia, M. (2010). Direct conversion of human fibroblasts to multilineage blood progenitors. *Nature* **468**, 521-526.
- Taatjes, D. J. (2010). The human Mediator complex: a versatile, genome-wide regulator of transcription. *Trends Biochem. Sci.* **35**, 315-322.
- Takahashi, K. and Yamanaka, S. (2006). Induction of pluripotent stem cells from mouse embryonic and adult fibroblast cultures by defined factors. *Cell* **126**, 663-676.
- Takahashi, H., Parmely, T. J., Sato, S., Tomomori-Sato, C., Banks, C. A., Kong, S. E., Szutorisz, H., Swanson, S. K., Martin-Brown, S., Washburn, M. P. et al. (2011). Human mediator subunit MED26 functions as a docking site for transcription elongation factors. *Cell* **146**, 92-104.
- Taubert, S., Van Gilst, M. R., Hansen, M. and Yamamoto, K. R. (2006). A Mediator subunit, MDT-15, integrates regulation of fatty acid metabolism by NHR-49-dependent and -independent pathways in *C. elegans*. *Genes Dev.* **20**, 1137-1149.
- Terriente-Félix, A., López-Varea, A. and de Celis, J. F. (2010). Identification of genes affecting wing patterning through a loss-of-function mutagenesis screen and characterization of med15 function during wing development. *Genetics* **185**, 671-684.
- Thakur, J. K., Arthanari, H., Yang, F., Pan, S. J., Fan, X., Breger, J., Frueh, D. P., Gulshan, K., Li, D. K., Mylonakis, E. et al. (2008). A nuclear receptor-like pathway regulating multidrug resistance in fungi. *Nature* **452**, 604-609.
- Thakur, J. K., Arthanari, H., Yang, F., Chau, K. H., Wagner, G. and Näär, A. M. (2009). Mediator subunit Gal11p/MED15 is required for fatty acid-dependent gene activation by yeast transcription factor Oaf1p. *J. Biol. Chem.* **284**, 4422-4428.
- Thompson, C. M., Koleske, A. J., Chao, D. M. and Young, R. A. (1993). A multisubunit complex associated with the RNA polymerase II CTD and TATA-binding protein in yeast. *Cell* **73**, 1361-1375.
- Tontonoz, P., Hu, E. and Spiegelman, B. M. (1995). Regulation of adipocyte gene expression and differentiation by peroxisome proliferator activated receptor gamma. *Curr. Opin. Genet. Dev.* **5**, 571-576.
- Toth, J. I., Datta, S., Athanikar, J. N., Freedman, L. P. and Osborne, T. F. (2004). Selective coactivator interactions in gene activation by SREBP-1a and -1c. *Mol. Cell. Biol.* **24**, 8288-8300.
- Treisman, J. (2001). Drosophila homologues of the transcriptional coactivation complex subunits TRAP240 and TRAP230 are required for identical processes in eye-antennal disc development. *Development* **128**, 603-615.
- Tsutsui, T., Fukasawa, R., Shinmyouzu, K., Nakagawa, R., Tobe, K., Tanaka, A. and Ohkuma, Y. (2013). Mediator complex recruits epigenetic regulators via its two cyclin-dependent kinase subunits to repress transcription of immune response genes. *J. Biol. Chem.* **288**, 20955-20965.
- Tudor, M., Murray, P. J., Onufryk, C., Jaenisch, R. and Young, R. A. (1999). Ubiquitous expression and embryonic requirement for RNA polymerase II coactivator subunit Srb7 in mice. *Genes Dev.* **13**, 2365-2368.
- Tutter, A. V., Kowalski, M. P., Baltus, G. A., Iourgenko, V., Labow, M., Li, E. and Kadam, S. (2009). Role for Med12 in regulation of Nanog and Nanog target genes. *J. Biol. Chem.* **284**, 3709-3718.
- Udayakumar, T. S., Belakavadi, M., Choi, K. H., Pandey, P. K. and Fondelli, J. D. (2006). Regulation of Aurora-A kinase gene expression via GABP recruitment of TRAP220/MED1. *J. Biol. Chem.* **281**, 14691-14699.
- Uiltsky, I. and Bartel, D. P. (2013). lincRNAs: genomics, evolution, and mechanisms. *Cell* **154**, 26-46.
- van Essen, D., Engist, B., Natoli, G. and Sacconi, S. (2009). Two modes of transcriptional activation at native promoters by NF-kappaB p65. *PLoS Biol.* **7**, e73.
- Verger, A., Baert, J. L., Verreman, K., Dewitte, F., Ferreira, E., Lens, Z., de Launoit, Y., Villeret, V. and Monté, D. (2013). The Mediator complex subunit MED25 is targeted by the N-terminal transactivation domain of the PEA3 group members. *Nucleic Acids Res.* **41**, 4847-4859.
- Vierbuchen, T., Ostermeier, A., Pang, Z. P., Kokubu, Y., Südhof, T. C. and Wernig, M. (2010). Direct conversion of fibroblasts to functional neurons by defined factors. *Nature* **463**, 1035-1041.
- Vogl, M. R., Reiprich, S., Küspert, M., Kosian, T., Schrewe, H., Nave, K. A. and Wegner, M. (2013). Sox10 cooperates with the mediator subunit 12 during terminal differentiation of myelinating glia. *J. Neurosci.* **33**, 6679-6690.

- Vulto-van Silfhout, A. T., de Vries, B. B., van Bon, B. W., Hoischen, A., Ruitkamp-Versteeg, M., Gilissen, C., Gao, F., van Zwam, M., Hartevelde, C. L., van Essen, A. J. et al. (2013). Mutations in MED12 cause X-linked Ohdo syndrome. *Am. J. Hum. Genet.* **92**, 401-406.
- Wada, O., Oishi, H., Takada, I., Yanagisawa, J., Yano, T. and Kato, S. (2004). BRCA1 function mediates a TRAP/DRIP complex through direct interaction with TRAP220. *Oncogene* **23**, 6000-6005.
- Wallberg, A. E., Yamamura, S., Malik, S., Spiegelman, B. M. and Roeder, R. G. (2003). Coordination of p300-mediated chromatin remodeling and TRAP/mediator function through coactivator PGC-1alpha. *Mol. Cell* **12**, 1137-1149.
- Wang, G., Cantin, G. T., Stevens, J. L. and Berk, A. J. (2001). Characterization of mediator complexes from HeLa cell nuclear extract. *Mol. Cell Biol.* **21**, 4604-4613.
- Wang, J. C., Walker, A., Blackwell, T. K. and Yamamoto, K. R. (2004a). The *Caenorhabditis elegans* ortholog of TRAP240, CeTRAP240/let-19, selectively modulates gene expression and is essential for embryogenesis. *J. Biol. Chem.* **279**, 29270-29277.
- Wang, S., Ge, K., Roeder, R. G. and Hankinson, O. (2004b). Role of mediator in transcriptional activation by the aryl hydrocarbon receptor. *J. Biol. Chem.* **279**, 13593-13600.
- Wang, G., Balamotis, M. A., Stevens, J. L., Yamaguchi, Y., Handa, H. and Berk, A. J. (2005). Mediator requirement for both recruitment and postrecruitment steps in transcription initiation. *Mol. Cell* **17**, 683-694.
- Wang, X., Yang, N., Uno, E., Roeder, R. G. and Guo, S. (2006). A subunit of the mediator complex regulates vertebrate neuronal development. *Proc. Natl. Acad. Sci. USA* **103**, 17284-17289.
- Wang, W., Huang, L., Huang, Y., Yin, J. W., Berk, A. J., Friedman, J. M. and Wang, G. (2009). Mediator MED23 links insulin signaling to the adipogenesis transcription cascade. *Dev. Cell* **16**, 764-771.
- Wang, W., Yao, X., Huang, Y., Hu, X., Liu, R., Hou, D., Chen, R. and Wang, G. (2013). Mediator MED23 regulates basal transcription in vivo via an interaction with P-TEFb. *Transcription* **4**, 39-51.
- Wansa, K. D. and Muscat, G. E. (2005). TRAP220 is modulated by the antineoplastic agent 6-Mercaptopurine, and mediates the activation of the NR4A subgroup of nuclear receptors. *J. Mol. Endocrinol.* **34**, 835-848.
- Wärnmark, A., Almlöf, T., Leers, J., Gustafsson, J. A. and Treuter, E. (2001). Differential recruitment of the mammalian mediator subunit TRAP220 by estrogen receptors ERalpha and ERbeta. *J. Biol. Chem.* **276**, 23397-23404.
- Wernig, M., Lengner, C. J., Hanna, J., Lodato, M. A., Steine, E., Foreman, R., Staerk, J., Markoulaki, S. and Jaenisch, R. (2008). A drug-inducible transgenic system for direct reprogramming of multiple somatic cell types. *Nat. Biotechnol.* **26**, 916-924.
- Westerling, T., Kuuluvainen, E. and Mäkelä, T. P. (2007). Cdk8 is essential for preimplantation mouse development. *Mol. Cell Biol.* **27**, 6177-6182.
- Whyte, W. A., Orlando, D. A., Hnisz, D., Abraham, B. J., Lin, C. Y., Kagey, M. H., Rahl, P. B., Lee, T. I. and Young, R. A. (2013). Master transcription factors and mediator establish super-enhancers at key cell identity genes. *Cell* **153**, 307-319.
- Wiederhold, T., Lee, M. F., James, M., Neujahr, R., Smith, N., Murthy, A., Hartwig, J., Gusella, J. F. and Ramesh, V. (2004). Magicin, a novel cytoskeletal protein associates with the NF2 tumor suppressor merlin and Grb2. *Oncogene* **23**, 8815-8825.
- Xu, X., Zhou, H. and Boyer, T. G. (2011). Mediator is a transducer of amyloid-precursor-protein-dependent nuclear signalling. *EMBO Rep.* **12**, 216-222.
- Yang, F., DeBeaumont, R., Zhou, S. and Näär, A. M. (2004). The activator-recruited cofactor/Mediator coactivator subunit ARC92 is a functionally important target of the VP16 transcriptional activator. *Proc. Natl. Acad. Sci. USA* **101**, 2339-2344.
- Yang, F., Vought, B. W., Satterlee, J. S., Walker, A. K., Jim Sun, Z. Y., Watts, J. L., DeBeaumont, R., Saito, R. M., Hyberts, S. G., Yang, S. et al. (2006). An ARC/Mediator subunit required for SREBP control of cholesterol and lipid homeostasis. *Nature* **442**, 700-704.
- Yang, X., Zhao, M., Xia, M., Liu, Y., Yan, J., Ji, H. and Wang, G. (2012). Selective requirement for Mediator MED23 in Ras-active lung cancer. *Proc. Natl. Acad. Sci. USA* **109**, E2813-E2822.
- Yin, J. W., Liang, Y., Park, J. Y., Chen, D., Yao, X., Xiao, Q., Liu, Z., Jiang, B., Fu, Y., Bao, M. et al. (2012). Mediator MED23 plays opposing roles in directing smooth muscle cell and adipocyte differentiation. *Genes Dev.* **26**, 2192-2205.
- Yoda, A., Kouike, H., Okano, H. and Sawa, H. (2005). Components of the transcriptional Mediator complex are required for asymmetric cell division in *C. elegans*. *Development* **132**, 1885-1893.
- Yuan, C. X., Ito, M., Fondell, J. D., Fu, Z. Y. and Roeder, R. G. (1998). The TRAP220 component of a thyroid hormone receptor-associated protein (TRAP) coactivator complex interacts directly with nuclear receptors in a ligand-dependent fashion. *Proc. Natl. Acad. Sci. USA* **95**, 7939-7944.
- Zhao, M., Yang, X., Fu, Y., Wang, H., Ning, Y., Yan, J., Chen, Y. G. and Wang, G. (2013). Mediator MED15 modulates transforming growth factor beta (TGFβ)/Smad signaling and breast cancer cell metastasis. *J. Mol. Cell Biol.* **5**, 57-60.
- Zhou, R., Bonneaud, N., Yuan, C. X., de Santa Barbara, P., Boizet, B., Schomber, T., Scherer, G., Roeder, R. G., Poulat, F. and Berta, P. (2002). SOX9 interacts with a component of the human thyroid hormone receptor-associated protein complex. *Nucleic Acids Res.* **30**, 3245-3252.
- Zhou, H., Kim, S., Ishii, S. and Boyer, T. G. (2006). Mediator modulates Gli3-dependent Sonic hedgehog signaling. *Mol. Cell Biol.* **26**, 8667-8682.
- Zhu, Y., Qi, C., Jain, S., Rao, M. S. and Reddy, J. K. (1997). Isolation and characterization of PBP, a protein that interacts with peroxisome proliferator-activated receptor. *J. Biol. Chem.* **272**, 25500-25506.
- Zhu, Y., Qi, C., Jain, S., Le Beau, M. M., Espinosa, R., III, Atkins, G. B., Lazar, M. A., Yeldandi, A. V., Rao, M. S. and Reddy, J. K. (1999). Amplification and overexpression of peroxisome proliferator-activated receptor binding protein (PBP/PPARBP) gene in breast cancer. *Proc. Natl. Acad. Sci. USA* **96**, 10848-10853.
- Zhu, Y., Qi, C., Jia, Y., Nye, J. S., Rao, M. S. and Reddy, J. K. (2000). Deletion of PBP/PPARBP, the gene for nuclear receptor coactivator peroxisome proliferator-activated receptor-binding protein, results in embryonic lethality. *J. Biol. Chem.* **275**, 14779-14782.
